# Supplementary material
Source: ML conference proceedings conference paper supplement (https://openaccess.thecvf.com/content/CVPR_2020/html/Gehrig_Video_to_Events_CVPR_2020_paper.html)
Supplement: Supplementary file 1 [file Gehrig_Video_to_Events_CVPR_2020_supplemental.zip]

# Supplementary Material – Video to Events: Recycling Video Datasets for Event Cameras

Daniel Gehrig\*   Mathias Gehrig\*   Javier Hidalgo-Carrió   Davide Scaramuzza  
Dept. Informatics, Univ. of Zurich and  
Dept. of Neuroinformatics, Univ. of Zurich and ETH Zurich

## 1. Appendix

In this section we provide additional qualitative results from our segmentation experiment in Sec. 4.2. Several examples from the test set can be viewed in Fig. 1. We used the network trained with the EST event representation and fine-tuned on real data. Fine-tuning was only performed for two epochs.

## References

- [1] Iñigo Alonso and Ana C Murillo. EV-SegNet: Semantic segmentation for event-based cameras. In *IEEE Conf. Comput. Vis. Pattern Recog. Workshops (CVPRW)*, 2019. 2
- [2] Jonathan Binas, Daniel Neil, Shih-Chii Liu, and Tobi Delbruck. DDD17: End-to-end DAVIS driving dataset. In *ICML Workshop on Machine Learning for Autonomous Vehicles*, 2017. 2

---

\*Equal contribution

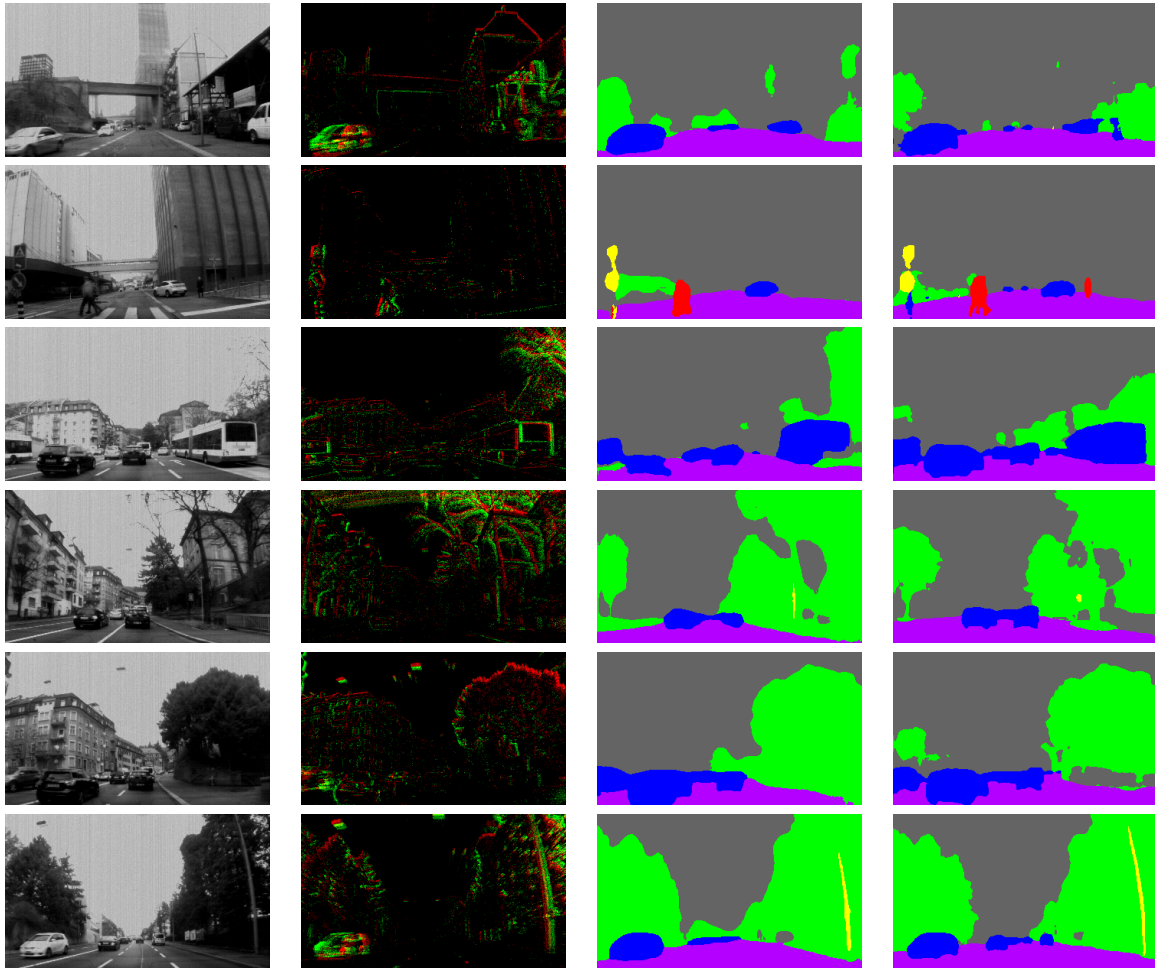

(a) DAVIS frame

(b) events

(c) prediction

(d) labels

Figure 1. A side-by-side view of event-based semantic segmentation predictions for the test set of the DAVIS Driving Dataset (DDD17) [2]. (a) DAVIS frame, (b) visualization of the events used to generate the predictions in (c) and (d) the ground truth labels generated from the frames in (a) [1]. The colors represent the following classes: violet: street; green: vegetation; red: person; blue: car; yellow: object; gray: background).
